# Supplementary material for: Weak, Broken, but Working—Intramolecular Hydrogen Bond in 2,2′-bipyridine
Source: MDPI journal article supplement (doi:10.3390/ijms241210390), 2023-06-20
Supplement: s1 [file s1]

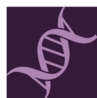

Supporting information

## Title

# Weak, broken, but working - intramolecular hydrogen bond in 2,2'-bipyridine

Ilya G. Shenderovich

<sup>1</sup>Institute of Organic Chemistry, University of Regensburg, 93053 Regensburg, Germany; ilya.shenderovich@ur.de

| Content    |                                                                                                                                                                                                                                             | Page |
|------------|---------------------------------------------------------------------------------------------------------------------------------------------------------------------------------------------------------------------------------------------|------|
| Table S1.  | The distance $r_3$ , the electronic energy, and the Mulliken charges of the binding proton and the N <sup>i</sup> nitrogen of PyHPy <sup>+</sup> obtained for selected distances $r_2$ at $\omega$ B97XD/def2tzvp and SCRF=(Solvent=water). | 2    |
| Table S2.  | The distance $r_3$ , the electronic energy, and the Mulliken charges of the binding proton and the N <sup>i</sup> nitrogen of PyHPy <sup>+</sup> obtained for selected distances $r_2$ at TPSSh/def2qzvp and SCRF=(Solvent=water).          | 2    |
| Table S3.  | The distance $r_3$ , the electronic energy, and the Mulliken charges of the binding proton and the N <sup>i</sup> nitrogen of PyHPy <sup>+</sup> obtained for selected distances $r_2$ at $\omega$ B97XD/def2qzvp and SCRF=(Solvent=water). | 3    |
| Table S4.  | Geometry of BiPyH <sup>+</sup> obtained for selected $r_1$ at $\omega$ B97XD/def2tzvp.                                                                                                                                                      | 3    |
| Table S5.  | Geometry of PhenH <sup>+</sup> obtained for selected $r_1$ at $\omega$ B97XD/def2tzvp.                                                                                                                                                      | 3    |
| Table S6.  | Geometry of BiPyH <sup>+</sup> obtained for selected $r_1$ at $\omega$ B97XD/def2tzvp SCRF=(Solvent=water).                                                                                                                                 | 4    |
| Table S7.  | Geometry of PhenH <sup>+</sup> obtained for selected $r_1$ at $\omega$ B97XD/def2tzvp SCRF=(Solvent=water).                                                                                                                                 | 4    |
| Table S8.  | The geometry, energy and N-H stretches of BiPyH <sup>+</sup> obtained for selected $r_3$ at $\omega$ B97XD/def2tzvp SCRF=(Solvent=water).                                                                                                   | 4    |
| Table S9.  | Crystallographic data for the single crystal XRD structure of BiPyH <sup>+</sup> [ClO <sub>4</sub> ] <sup>-</sup> obtained from acetonitrile.                                                                                               | 5    |
| Table S10. | Crystallographic data for the single crystal XRD structure of BiPyH <sup>+</sup> [ClO <sub>4</sub> ] <sup>-</sup> obtained from nitromethane.                                                                                               | 6    |
| Table S11. | The atomic coordinates of BiPyHClO <sub>4</sub> _Tq_W                                                                                                                                                                                       | 7    |
| Table S12. | The atomic coordinates of ZUTDAT_Tq_W                                                                                                                                                                                                       | 7    |
| Table S13. | The atomic coordinates of ZUTDAT01_Tq_W                                                                                                                                                                                                     | 7    |
| Table S14. | The atomic coordinates of OPENAN_Tt_W                                                                                                                                                                                                       | 8    |
| Table S15. | The atomic coordinates of OPENAN01_Tt_W                                                                                                                                                                                                     | 9    |
| Table S16. | The atomic coordinates of ZUTDEX_Tq_W                                                                                                                                                                                                       | 9    |

**Table S1.** The  $N^p \dots N^f$  distance ( $r_3$ ), the electronic energy, and the Mulliken charges of the binding proton ( $q(H)$ ) and the  $N^f$  nitrogen ( $q(N^f)$ ) of the hydrogen bonded pyridine- $N^p$ -H... $N^f$ -pyridine cation obtained for selected H... $N^f$  distances ( $r_2$ ) at  $\omega$ B97XD/Def2tzvp and SCRF=(Solvent=water).

| Substance            | $r_2$<br>(H... $N^f$ , Å) | $r_3$<br>( $N^p \dots N^f$ , Å) | $q(H)$<br>(e) | $q(N^f)$<br>(e) | $\varepsilon^a$<br>( $e^2/\text{Å}$ ) | E<br>Hartree |
|----------------------|---------------------------|---------------------------------|---------------|-----------------|---------------------------------------|--------------|
| pyridine             |                           |                                 |               |                 |                                       | -248.288892  |
| pyridinium           |                           |                                 |               |                 |                                       | -248.7409453 |
| [PyHPy] <sup>+</sup> | 4.987853                  | 6.0                             | -0.325875     | 0.321172        | -0.02098                              | -497.0301608 |
| [PyHPy] <sup>+</sup> | 3.987671                  | 5.0                             | -0.331334     | 0.317988        | -0.02642                              | -497.0306336 |
| [PyHPy] <sup>+</sup> | 2.983066                  | 4.0                             | -0.335668     | 0.303313        | -0.03413                              | -497.0330703 |
| [PyHPy] <sup>+</sup> | 2.780714                  | 3.8                             | -0.341726     | 0.294080        | -0.03614                              | -497.0345875 |
| [PyHPy] <sup>+</sup> | 2.576773                  | 3.6                             | -0.351196     | 0.284958        | -0.03884                              | -497.0366668 |
| [PyHPy] <sup>+</sup> | 2.474484                  | 3.5                             | -0.357204     | 0.280913        | -0.04055                              | -497.0379185 |
| [PyHPy] <sup>+</sup> | 2.268262                  | 3.3                             | -0.370241     | 0.276484        | -0.04513                              | -497.0408395 |
| [PyHPy] <sup>+</sup> | 2.059514                  | 3.1                             | -0.380134     | 0.273908        | -0.05056                              | -497.0441034 |
| [PyHPy] <sup>+</sup> | 1.953751                  | 3.0                             | -0.381079     | 0.272330        | -0.05312                              | -497.0456908 |
| [PyHPy] <sup>+</sup> | 1.900257                  | 2.95                            | -0.380156     | 0.271149        | -0.05276                              | -497.04642   |
| [PyHPy] <sup>+</sup> | 1.846680                  | 2.9                             | -0.378500     | 0.269806        | -0.05374                              | -497.0470629 |
| [PyHPy] <sup>+</sup> | 1.792227                  | 2.85                            | -0.375775     | 0.268202        | -0.05458                              | -497.0475965 |
| [PyHPy] <sup>+</sup> | 1.736974                  | 2.8                             | -0.372025     | 0.267112        | -0.05545                              | -497.0479947 |
| [PyHPy] <sup>+</sup> | 1.669100                  | 2.74                            | -0.365609     | 0.266495        | -0.05609                              | -497.0482533 |
| [PyHPy] <sup>+</sup> | 1.645433                  | 2.719497                        | -0.362929     | 0.266527        | -0.05795                              | -497.0482728 |
| [PyHPy] <sup>+</sup> | 1.523208                  | 2.618                           | -0.344976     | 0.268699        | -0.06085                              | -497.0476784 |

<sup>a</sup>The electric potential energy  $\varepsilon = q(H)q(N^f)/r_2$  associated with the  $N^f \dots H$  interaction.

**Table S2.** The  $N^p \dots N^f$  distance ( $r_3$ ), the electronic energy, and the Mulliken charges of the binding proton ( $q(H)$ ) and the  $N^f$  nitrogen ( $q(N^f)$ ) of the hydrogen bonded pyridine- $N^p$ -H... $N^f$ -pyridine cation obtained for selected H... $N^f$  distances ( $r_2$ ) at TPSSH/Def2qzvp and SCRF=(Solvent=water).

| Substance            | $r_2$<br>(H... $N^f$ , Å) | $r_3$<br>( $N^p \dots N^f$ , Å) | $q(H)$<br>(e) | $q(N^f)$<br>(e) | $\varepsilon^a$<br>( $e^2/\text{Å}$ ) | E<br>Hartree  |
|----------------------|---------------------------|---------------------------------|---------------|-----------------|---------------------------------------|---------------|
| pyridine             |                           |                                 |               |                 |                                       | -248.4101725  |
| pyridinium           |                           |                                 |               |                 |                                       | -248.8613039  |
| [PyHPy] <sup>+</sup> | 2.676394                  | 3.7                             | -0.372141     | 0.288767        | -0.04015                              | -497.2758706  |
| [PyHPy] <sup>+</sup> | 2.574324                  | 3.6                             | -0.369204     | 0.288999        | -0.04145                              | -497.2768722  |
| [PyHPy] <sup>+</sup> | 2.471759                  | 3.5                             | -0.366007     | 0.287572        | -0.04258                              | -497.2780031  |
| [PyHPy] <sup>+</sup> | 2.368570                  | 3.4                             | -0.362293     | 0.285675        | -0.04370                              | -497.2792 857 |
| [PyHPy] <sup>+</sup> | 2.264660                  | 3.3                             | -0.358001     | 0.284147        | -0.04492                              | -497.2806984  |
| [PyHPy] <sup>+</sup> | 2.159991                  | 3.2                             | -0.353510     | 0.283719        | -0.04643                              | -497.2822254  |

<sup>a</sup>The electric potential energy  $\varepsilon = q(H)q(N^f)/r_2$  associated with the  $N^f \dots H$  interaction.

**Table S3.** The  $N_p \dots N^f$  distance ( $r_3$ ), the electronic energy, and the Mulliken charges of the binding proton ( $q(H)$ ) and the  $N^f$  nitrogen ( $q(N^f)$ ) of the hydrogen bonded pyridine- $N^p$ -H... $N^f$ -pyridine cation obtained for selected H... $N^f$  distances ( $r_2$ ) at  $\omega$ B97XD/Def2qzvp and SCRF=(Solvent=water).

| Substance            | $r_2$<br>(H... $N^f$ , Å) | $r_3$<br>( $N^p \dots N^f$ , Å) | $q(H)$<br>(e) | $q(N^f)$<br>(e) | $\epsilon^a$<br>( $e^2/\text{Å}$ ) | E<br>Hartree |
|----------------------|---------------------------|---------------------------------|---------------|-----------------|------------------------------------|--------------|
| pyridine             |                           |                                 |               |                 |                                    | -248.3048658 |
| pyridinium           |                           |                                 |               |                 |                                    | -248.7574992 |
| [PyHPy] <sup>+</sup> | 2.680144                  | 3.7                             | 0.284131      | -0.434869       | -0.04610                           | -497.0676899 |
| [PyHPy] <sup>+</sup> | 2.578196                  | 3.6                             | 0.280033      | -0.435436       | -0.04730                           | -497.0688081 |
| [PyHPy] <sup>+</sup> | 2.475891                  | 3.5                             | 0.275616      | -0.436552       | -0.04860                           | -497.0700663 |
| [PyHPy] <sup>+</sup> | 2.372998                  | 3.4                             | 0.270708      | -0.437007       | -0.04985                           | -497.0714744 |
| [PyHPy] <sup>+</sup> | 2.269724                  | 3.3                             | 0.266670      | -0.438097       | -0.05147                           | -497.0730063 |

<sup>a</sup>The electric potential energy  $\epsilon = q(H)q(N^f)/r_2$  associated with the  $N^f \dots H$  interaction.

**Table S4.** Geometry of BiPyH<sup>+</sup> obtained for selected  $r_1$  distances at  $\omega$ B97XD/Def2tzvp.

| $r_1$<br>( $N^p \dots H$ , Å) | $r_2$<br>(H... $N^f$ , Å) | $r_3$<br>( $N^p \dots N^f$ , Å) | $\alpha$<br>( $N^p H N^f$ ) | $\beta$<br>( $C_4 N^p H$ ) | $\gamma$<br>( $H N^f C_4'$ ) | E<br>Hartree |
|-------------------------------|---------------------------|---------------------------------|-----------------------------|----------------------------|------------------------------|--------------|
| 1.025207                      | 2.024119                  | 2.570428                        | 110.580                     | 175.49365                  | 147.37505                    | -495.7729298 |
| 1.05                          | 1.993658                  | 2.564137                        | 110.96                      | 174.75767                  | 148.04490                    | -495.7725251 |
| 1.10                          | 1.914952                  | 2.545255                        | 112.339                     | 172.84602                  | 149.48117                    | -495.769708  |
| 1.15                          | 1.788732                  | 2.508709                        | 115.506                     | 169.67277                  | 151.13609                    | -495.7652442 |
| 1.20                          | 1.586534                  | 2.440291                        | 121.649                     | 164.49046                  | 153.10275                    | -495.7607107 |
| 1.25                          | 1.402882                  | 2.376221                        | 127.106                     | 159.68128                  | 155.11786                    | -495.7580059 |
| 1.297387                      | 1.297387                  | 2.346111                        | 129.423                     | 156.83317                  | 156.83311                    | -495.7573155 |

**Table S5.** Geometry of PhenH<sup>+</sup> obtained for selected  $r_1$  distances at  $\omega$ B97XD/Def2tzvp.

| $r_1$<br>( $N^p \dots H$ , Å) | $r_2$<br>(H... $N^f$ , Å) | $r_3$<br>( $N^p \dots N^f$ , Å) | $\alpha$<br>( $N^p H N^f$ ) | $\beta$<br>( $C_4 N^p H$ ) | $\gamma$<br>( $H N^f C_4'$ ) | E<br>Hartree |
|-------------------------------|---------------------------|---------------------------------|-----------------------------|----------------------------|------------------------------|--------------|
| 1.019898                      | 2.226174                  | 2.688753                        | 105.75983                   | 176.37667                  | 142.50813                    | -572.0020078 |
| 1.05                          | 2.203243                  | 2.685110                        | 105.71314                   | 175.82143                  | 143.23586                    | -572.0013643 |
| 1.10                          | 2.156199                  | 2.676364                        | 105.95229                   | 174.62459                  | 144.47313                    | -571.9979315 |
| 1.15                          | 2.089097                  | 2.661070                        | 106.87093                   | 172.85628                  | 145.77566                    | -571.9923753 |
| 1.20                          | 1.983735                  | 2.633045                        | 109.09807                   | 170.01137                  | 147.17895                    | -571.9855869 |
| 1.25                          | 1.735857                  | 2.550609                        | 116.40517                   | 163.15824                  | 148.88241                    | -571.9788076 |
| 1.25                          | 1.732075                  | 2.548989                        | 116.53902                   | 163.05713                  | 148.89704                    | -571.9788116 |
| 1.30                          | 1.423681                  | 2.430672                        | 126.29851                   | 150.74148                  | 154.37012                    | -571.9752034 |
| 1.332492                      | 1.332492                  | 2.40027                         | 128.49316                   | 151.81528                  | 151.82004                    | -571.9747212 |

**Table S6.** Geometry of BiPyH<sup>+</sup> obtained for selected r<sub>1</sub> distances at  $\omega$ B97XD/Def2tzvp SCRF=(Solvent=water).

| r <sub>1</sub><br>(N <sup>p</sup> ..H, Å) | r <sub>2</sub><br>(H..N <sup>f</sup> , Å) | r <sub>3</sub><br>(N <sup>p</sup> ...N <sup>f</sup> , Å) | $\alpha$<br>(N <sup>p</sup> HN <sup>f</sup> ) | $\beta$<br>(C <sub>4</sub> N <sup>p</sup> H) | $\gamma$<br>(HN <sup>f</sup> C <sub>4</sub> ) | E<br>Hartree |
|-------------------------------------------|-------------------------------------------|----------------------------------------------------------|-----------------------------------------------|----------------------------------------------|-----------------------------------------------|--------------|
| 1.020850                                  | 2.079695                                  | 2.595704                                                 | 108.82897                                     | 176.72056                                    | 146.73116                                     | -495.8434348 |
| 1.297282                                  | 1.297282                                  | 2.343505                                                 | 129.17357                                     | 156.90195                                    | 156.90195                                     | -495.8245433 |

**Table S7.** Geometry of PhenH<sup>+</sup> obtained for selected r<sub>1</sub> distances at  $\omega$ B97XD/Def2tzvp SCRF=(Solvent=water).

| r <sub>1</sub><br>(N <sup>p</sup> ..H, Å) | r <sub>2</sub><br>(H..N <sup>f</sup> , Å) | r <sub>3</sub><br>(N <sup>p</sup> ...N <sup>f</sup> , Å) | $\alpha$<br>(N <sup>p</sup> HN <sup>f</sup> ) | $\beta$<br>(C <sub>4</sub> N <sup>p</sup> H) | $\gamma$<br>(HN <sup>f</sup> C <sub>4</sub> ) | E<br>Hartree |
|-------------------------------------------|-------------------------------------------|----------------------------------------------------------|-----------------------------------------------|----------------------------------------------|-----------------------------------------------|--------------|
| 1.017223                                  | 2.273055                                  | 2.710538                                                 | 104.34181                                     | 177.57127                                    | 142.13853                                     | -572.0713802 |
| 1.332127                                  | 1.332127                                  | 2.397702                                                 | 128.30360                                     | 151.92158                                    | 151.92156                                     | -572.0404339 |

**Table S8.** The geometry, energy and N<sup>p</sup>-H stretches of BiPyH<sup>+</sup> obtained for selected r<sub>3</sub> distances at  $\omega$ B97XD/Def2tzvp SCRF=(Solvent=water).

| r <sub>1</sub><br>(N <sup>p</sup> ..H, Å) | r <sub>2</sub><br>(H..N <sup>f</sup> , Å) | r <sub>3</sub><br>(N <sup>p</sup> ...N <sup>f</sup> , Å) | $\nu$ (N <sup>p</sup> -H)<br>cm <sup>-1</sup> | E<br>Hartree |
|-------------------------------------------|-------------------------------------------|----------------------------------------------------------|-----------------------------------------------|--------------|
| 1.019401                                  | 2.080350                                  | 2.595114                                                 | 3472                                          | -495.8742696 |
| 1.021834                                  | 1.948769                                  | 2.5                                                      | 3428                                          | -495.8733569 |
| 1.023645                                  | 1.878512                                  | 2.45                                                     | 3387                                          | -495.8719693 |
| 1.027280                                  | 1.754386                                  | 2.36                                                     | 3304                                          | -495.8676032 |
| 1.027761                                  | 1.740297                                  | 2.35                                                     | 3295                                          | -495.8669472 |
| 1.296357                                  | 1.296357                                  | 2.342063                                                 | -1499                                         | -495.8550242 |

**Table S9.** Crystallographic data for the single crystal XRD structure of BiPyH<sup>+</sup> [ClO<sub>4</sub>]<sup>-</sup> obtained from acetonitrile.

|                                       |                                                                               |                                                                                                                                                                                                                                                                                                                                                                                                                                                                                                                                                                       |
|---------------------------------------|-------------------------------------------------------------------------------|-----------------------------------------------------------------------------------------------------------------------------------------------------------------------------------------------------------------------------------------------------------------------------------------------------------------------------------------------------------------------------------------------------------------------------------------------------------------------------------------------------------------------------------------------------------------------|
| Formula                               | C <sub>20</sub> H <sub>18</sub> Cl <sub>2</sub> N <sub>4</sub> O <sub>8</sub> | <b>Crystal Data.</b> C <sub>20</sub> H <sub>18</sub> Cl <sub>2</sub> N <sub>4</sub> O <sub>8</sub> , $M_r$ = 513.293, monoclinic, $Pc$ (No. 7), $a$ = 5.9609(1) Å, $b$ = 12.8314(2) Å, $c$ = 7.0548(1) Å, $\beta$ = 100.159(2)°, $\alpha = \gamma$ = 90°, $V$ = 531.139(15) Å <sup>3</sup> , $T$ = 123.00(10) K, $Z$ = 1, $Z'$ = 0.5, $\mu$ (Cu K $\alpha$ ) = 3.279, 18780 reflections measured, 2129 unique ( $R_{\text{int}}$ = 0.0351) which were used in all calculations. The final $wR_2$ was 0.0755 (all data) and $R_1$ was 0.0299 ( $I \geq 2 \sigma(I)$ ). |
| $D_{\text{calc.}} / \text{g cm}^{-3}$ | 1.605                                                                         |                                                                                                                                                                                                                                                                                                                                                                                                                                                                                                                                                                       |
| $\mu / \text{mm}^{-1}$                | 3.279                                                                         |                                                                                                                                                                                                                                                                                                                                                                                                                                                                                                                                                                       |
| Formula Weight                        | 513.293                                                                       |                                                                                                                                                                                                                                                                                                                                                                                                                                                                                                                                                                       |
| Colour                                | clear colourless                                                              |                                                                                                                                                                                                                                                                                                                                                                                                                                                                                                                                                                       |
| Shape                                 | prism-shaped                                                                  |                                                                                                                                                                                                                                                                                                                                                                                                                                                                                                                                                                       |
| Size/mm <sup>3</sup>                  | 0.08×0.06×0.03                                                                |                                                                                                                                                                                                                                                                                                                                                                                                                                                                                                                                                                       |
| $T/\text{K}$                          | 123.00(10)                                                                    |                                                                                                                                                                                                                                                                                                                                                                                                                                                                                                                                                                       |
| Crystal System                        | monoclinic                                                                    |                                                                                                                                                                                                                                                                                                                                                                                                                                                                                                                                                                       |
| Flack Parameter                       | -0.110(5)                                                                     |                                                                                                                                                                                                                                                                                                                                                                                                                                                                                                                                                                       |
| Hooft Parameter                       | -0.110(5)                                                                     |                                                                                                                                                                                                                                                                                                                                                                                                                                                                                                                                                                       |
| Space Group                           | $Pc$                                                                          |                                                                                                                                                                                                                                                                                                                                                                                                                                                                                                                                                                       |
| $a/\text{\AA}$                        | 5.9609(1)                                                                     |                                                                                                                                                                                                                                                                                                                                                                                                                                                                                                                                                                       |
| $b/\text{\AA}$                        | 12.8314(2)                                                                    |                                                                                                                                                                                                                                                                                                                                                                                                                                                                                                                                                                       |
| $c/\text{\AA}$                        | 7.0548(1)                                                                     |                                                                                                                                                                                                                                                                                                                                                                                                                                                                                                                                                                       |
| $\alpha/^\circ$                       | 90                                                                            |                                                                                                                                                                                                                                                                                                                                                                                                                                                                                                                                                                       |
| $\beta/^\circ$                        | 100.159(2)                                                                    |                                                                                                                                                                                                                                                                                                                                                                                                                                                                                                                                                                       |
| $\gamma/^\circ$                       | 90                                                                            |                                                                                                                                                                                                                                                                                                                                                                                                                                                                                                                                                                       |
| $V/\text{\AA}^3$                      | 531.139(15)                                                                   |                                                                                                                                                                                                                                                                                                                                                                                                                                                                                                                                                                       |
| $Z$                                   | 1                                                                             |                                                                                                                                                                                                                                                                                                                                                                                                                                                                                                                                                                       |
| $Z'$                                  | 0.5                                                                           |                                                                                                                                                                                                                                                                                                                                                                                                                                                                                                                                                                       |
| Wavelength/Å                          | 1.54184                                                                       |                                                                                                                                                                                                                                                                                                                                                                                                                                                                                                                                                                       |
| Radiation type                        | Cu K $\alpha$                                                                 |                                                                                                                                                                                                                                                                                                                                                                                                                                                                                                                                                                       |
| $\theta_{\text{min}}/^\circ$          | 3.44                                                                          |                                                                                                                                                                                                                                                                                                                                                                                                                                                                                                                                                                       |
| $\theta_{\text{max}}/^\circ$          | 75.36                                                                         |                                                                                                                                                                                                                                                                                                                                                                                                                                                                                                                                                                       |
| Measured Refl's.                      | 18780                                                                         |                                                                                                                                                                                                                                                                                                                                                                                                                                                                                                                                                                       |
| Indep't Refl's                        | 2129                                                                          |                                                                                                                                                                                                                                                                                                                                                                                                                                                                                                                                                                       |
| Refl's $I \geq 2 \sigma(I)$           | 2024                                                                          |                                                                                                                                                                                                                                                                                                                                                                                                                                                                                                                                                                       |
| $R_{\text{int}}$                      | 0.0351                                                                        |                                                                                                                                                                                                                                                                                                                                                                                                                                                                                                                                                                       |
| Parameters                            | 154                                                                           |                                                                                                                                                                                                                                                                                                                                                                                                                                                                                                                                                                       |
| Restraints                            | 2                                                                             |                                                                                                                                                                                                                                                                                                                                                                                                                                                                                                                                                                       |
| Largest Peak                          | 0.1584                                                                        |                                                                                                                                                                                                                                                                                                                                                                                                                                                                                                                                                                       |
| Deepest Hole                          | -0.2172                                                                       |                                                                                                                                                                                                                                                                                                                                                                                                                                                                                                                                                                       |
| GooF                                  | 1.0415                                                                        |                                                                                                                                                                                                                                                                                                                                                                                                                                                                                                                                                                       |
| $wR_2$ (all data)                     | 0.0755                                                                        |                                                                                                                                                                                                                                                                                                                                                                                                                                                                                                                                                                       |
| $wR_2$                                | 0.0744                                                                        |                                                                                                                                                                                                                                                                                                                                                                                                                                                                                                                                                                       |
| $R_1$ (all data)                      | 0.0326                                                                        |                                                                                                                                                                                                                                                                                                                                                                                                                                                                                                                                                                       |
| $R_1$                                 | 0.0299                                                                        |                                                                                                                                                                                                                                                                                                                                                                                                                                                                                                                                                                       |

**Table S10.** Crystallographic data for the single crystal XRD structure of BiPyH<sup>+</sup> [ClO<sub>4</sub>]<sup>-</sup> obtained from nitromethane.

|                                     |                                                                |                                                                                                                                                                                                                                                                                                                                                                                                                                                                                                                                                       |
|-------------------------------------|----------------------------------------------------------------|-------------------------------------------------------------------------------------------------------------------------------------------------------------------------------------------------------------------------------------------------------------------------------------------------------------------------------------------------------------------------------------------------------------------------------------------------------------------------------------------------------------------------------------------------------|
| Formula                             | C <sub>10</sub> H <sub>9</sub> ClN <sub>2</sub> O <sub>4</sub> | <b>Crystal Data.</b> C <sub>10</sub> H <sub>9</sub> ClN <sub>2</sub> O <sub>4</sub> , $M_r$ = 256.647, monoclinic, $Pc$ (No. 7), $a$ = 5.9583(1) Å, $b$ = 12.8317(2) Å, $c$ = 7.0497(1) Å, $\beta$ = 100.174(2)°, $\alpha = \gamma$ = 90°, $V$ = 530.511(15) Å <sup>3</sup> , $T$ = 122.97(10) K, $Z$ = 2, $Z'$ = 1, $\mu(\text{Cu K}\alpha)$ = 3.282, 7164 reflections measured, 1830 unique ( $R_{\text{int}}$ = 0.0403) which were used in all calculations. The final $wR_2$ was 0.0907 (all data) and $R_1$ was 0.0353 ( $I \geq 2 \sigma(I)$ ). |
| $D_{\text{calc.}}/\text{g cm}^{-3}$ | 1.607                                                          |                                                                                                                                                                                                                                                                                                                                                                                                                                                                                                                                                       |
| $\mu/\text{mm}^{-1}$                | 3.282                                                          |                                                                                                                                                                                                                                                                                                                                                                                                                                                                                                                                                       |
| Formula Weight                      | 256.647                                                        |                                                                                                                                                                                                                                                                                                                                                                                                                                                                                                                                                       |
| Colour                              | clear colourless                                               |                                                                                                                                                                                                                                                                                                                                                                                                                                                                                                                                                       |
| Shape                               | prism-shaped                                                   |                                                                                                                                                                                                                                                                                                                                                                                                                                                                                                                                                       |
| Size/mm <sup>3</sup>                | 0.27×0.17×0.15                                                 |                                                                                                                                                                                                                                                                                                                                                                                                                                                                                                                                                       |
| $T/\text{K}$                        | 122.97(10)                                                     |                                                                                                                                                                                                                                                                                                                                                                                                                                                                                                                                                       |
| Crystal System                      | monoclinic                                                     |                                                                                                                                                                                                                                                                                                                                                                                                                                                                                                                                                       |
| Flack Parameter                     | -0.227(5)                                                      |                                                                                                                                                                                                                                                                                                                                                                                                                                                                                                                                                       |
| Hooft Parameter                     | -0.227(5)                                                      |                                                                                                                                                                                                                                                                                                                                                                                                                                                                                                                                                       |
| Space Group                         | $Pc$                                                           |                                                                                                                                                                                                                                                                                                                                                                                                                                                                                                                                                       |
| $a/\text{\AA}$                      | 5.9583(1)                                                      |                                                                                                                                                                                                                                                                                                                                                                                                                                                                                                                                                       |
| $b/\text{\AA}$                      | 12.8317(2)                                                     |                                                                                                                                                                                                                                                                                                                                                                                                                                                                                                                                                       |
| $c/\text{\AA}$                      | 7.0497(1)                                                      |                                                                                                                                                                                                                                                                                                                                                                                                                                                                                                                                                       |
| $\alpha/^\circ$                     | 90                                                             |                                                                                                                                                                                                                                                                                                                                                                                                                                                                                                                                                       |
| $\beta/^\circ$                      | 100.174(2)                                                     |                                                                                                                                                                                                                                                                                                                                                                                                                                                                                                                                                       |
| $\gamma/^\circ$                     | 90                                                             |                                                                                                                                                                                                                                                                                                                                                                                                                                                                                                                                                       |
| $V/\text{\AA}^3$                    | 530.511(15)                                                    |                                                                                                                                                                                                                                                                                                                                                                                                                                                                                                                                                       |
| $Z$                                 | 2                                                              |                                                                                                                                                                                                                                                                                                                                                                                                                                                                                                                                                       |
| $Z'$                                | 1                                                              |                                                                                                                                                                                                                                                                                                                                                                                                                                                                                                                                                       |
| Wavelength/Å                        | 1.54184                                                        |                                                                                                                                                                                                                                                                                                                                                                                                                                                                                                                                                       |
| Radiation type                      | Cu K $\alpha$                                                  |                                                                                                                                                                                                                                                                                                                                                                                                                                                                                                                                                       |
| $\theta_{\text{min}}/^\circ$        | 6.90                                                           |                                                                                                                                                                                                                                                                                                                                                                                                                                                                                                                                                       |
| $\theta_{\text{max}}/^\circ$        | 66.95                                                          |                                                                                                                                                                                                                                                                                                                                                                                                                                                                                                                                                       |
| Measured Refl's.                    | 7164                                                           |                                                                                                                                                                                                                                                                                                                                                                                                                                                                                                                                                       |
| Indep't Refl's                      | 1830                                                           |                                                                                                                                                                                                                                                                                                                                                                                                                                                                                                                                                       |
| Refl's $I \geq 2 \sigma(I)$         | 1826                                                           |                                                                                                                                                                                                                                                                                                                                                                                                                                                                                                                                                       |
| $R_{\text{int}}$                    | 0.0403                                                         |                                                                                                                                                                                                                                                                                                                                                                                                                                                                                                                                                       |
| Parameters                          | 154                                                            |                                                                                                                                                                                                                                                                                                                                                                                                                                                                                                                                                       |
| Restraints                          | 2                                                              |                                                                                                                                                                                                                                                                                                                                                                                                                                                                                                                                                       |
| Largest Peak                        | 0.1712                                                         |                                                                                                                                                                                                                                                                                                                                                                                                                                                                                                                                                       |
| Deepest Hole                        | -0.3188                                                        |                                                                                                                                                                                                                                                                                                                                                                                                                                                                                                                                                       |
| GooF                                | 1.0589                                                         |                                                                                                                                                                                                                                                                                                                                                                                                                                                                                                                                                       |
| $wR_2$ (all data)                   | 0.0907                                                         |                                                                                                                                                                                                                                                                                                                                                                                                                                                                                                                                                       |
| $wR_2$                              | 0.0905                                                         |                                                                                                                                                                                                                                                                                                                                                                                                                                                                                                                                                       |
| $R_1$ (all data)                    | 0.0354                                                         |                                                                                                                                                                                                                                                                                                                                                                                                                                                                                                                                                       |
| $R_1$                               | 0.0353                                                         |                                                                                                                                                                                                                                                                                                                                                                                                                                                                                                                                                       |

**Table S11.** The atomic coordinates of BiPyHClO<sub>4</sub>\_Tq\_W

|    |           |           |           |   |           |           |           |
|----|-----------|-----------|-----------|---|-----------|-----------|-----------|
| 7  | 1.588101  | -1.270095 | -0.530987 | 8 | -4.132292 | -1.163161 | -0.814114 |
| 7  | 0.299588  | 1.045344  | -0.280021 | 8 | -1.840054 | -0.915567 | -0.365064 |
| 6  | 1.621562  | 1.057003  | -0.036006 | 8 | -3.347934 | -1.310181 | 1.388146  |
| 6  | 2.169026  | -2.471061 | -0.555546 | 8 | -3.356013 | 0.764414  | 0.261579  |
| 6  | -0.452214 | 2.158098  | -0.356939 | 1 | 1.576061  | -3.274468 | -0.977051 |
| 6  | 2.302322  | -0.255281 | -0.009182 | 1 | 4.111901  | 0.423442  | 0.955409  |
| 6  | 3.580693  | -0.407617 | 0.514783  | 1 | 5.168031  | -1.817291 | 0.840921  |
| 6  | 2.245572  | 2.273828  | 0.144877  | 1 | 3.872073  | -3.710030 | -0.153111 |
| 6  | 1.500155  | 3.446344  | 0.077390  | 1 | -1.504850 | 2.000331  | -0.536892 |
| 6  | 0.131447  | 3.382048  | -0.173113 | 1 | -0.471851 | 4.275344  | -0.230676 |
| 6  | 4.169197  | -1.666970 | 0.453767  | 1 | 1.985484  | 4.402342  | 0.216034  |
| 6  | 3.453720  | -2.715049 | -0.089952 | 1 | 3.308945  | 2.314096  | 0.321510  |
| 17 | -3.177364 | -0.646289 | 0.120917  | 1 | -0.162977 | 0.134304  | -0.399534 |

**Table S12.** The atomic coordinates of ZUTDAT\_Tq\_W

|   |           |           |           |   |           |           |           |
|---|-----------|-----------|-----------|---|-----------|-----------|-----------|
| 6 | 0.775527  | 0.122894  | 0.027870  | 6 | -1.510954 | 1.279170  | -0.035464 |
| 7 | 1.285342  | -1.124154 | -0.023601 | 1 | -0.671707 | -1.843981 | 0.088370  |
| 6 | 2.615251  | -1.250903 | -0.062104 | 1 | 2.997704  | -2.263032 | -0.109327 |
| 6 | 3.465782  | -0.166066 | -0.038155 | 1 | 4.535362  | -0.324269 | -0.072932 |
| 6 | 2.943649  | 1.105113  | 0.030536  | 1 | 3.589996  | 1.971676  | 0.056532  |
| 6 | 1.564409  | 1.262477  | 0.067139  | 1 | 1.126041  | 2.248711  | 0.120099  |
| 6 | -0.711184 | 0.157761  | 0.023823  | 1 | -3.007730 | -2.254851 | 0.072227  |
| 7 | -1.323182 | -1.054839 | 0.062168  | 1 | -4.540233 | -0.250533 | -0.049195 |
| 6 | -2.656587 | -1.235447 | 0.039663  | 1 | -3.510788 | 2.013824  | -0.109121 |
| 6 | -3.468293 | -0.127641 | -0.027163 | 1 | -1.063726 | 2.260668  | -0.069474 |
| 6 | -2.882606 | 1.135099  | -0.059005 |   |           |           |           |

**Table S13.** The atomic coordinates of ZUTDAT01\_Tq\_W

|   |           |           |           |   |           |           |           |
|---|-----------|-----------|-----------|---|-----------|-----------|-----------|
| 6 | -1.506488 | 1.262836  | 0.038263  | 7 | 1.276810  | -1.114534 | 0.022857  |
| 6 | -2.870798 | 1.116206  | 0.060135  | 1 | -1.068044 | 2.248874  | 0.072733  |
| 6 | -3.444156 | -0.129980 | 0.023972  | 1 | -3.496683 | 1.996773  | 0.111779  |
| 6 | -2.641198 | -1.210708 | -0.038741 | 1 | -4.516085 | -0.256896 | 0.042369  |
| 6 | 0.768284  | 0.119031  | -0.037762 | 1 | -2.991287 | -2.231123 | -0.070458 |
| 6 | 1.558957  | 1.241245  | -0.065436 | 1 | 1.125370  | 2.230230  | -0.117253 |
| 6 | 2.930905  | 1.087169  | -0.031000 | 1 | 3.570117  | 1.959653  | -0.054684 |
| 6 | 3.449194  | -0.161829 | 0.040133  | 1 | 4.517925  | -0.325864 | 0.076909  |
| 6 | 2.600823  | -1.229015 | 0.061272  | 1 | 2.984468  | -2.241449 | 0.113093  |
| 6 | -0.700644 | 0.159439  | -0.025953 | 1 | -0.678687 | -1.834551 | -0.083861 |
| 7 | -1.322004 | -1.038611 | -0.057131 |   |           |           |           |

**Table S14.** The atomic coordinates of OPENAN\_Tt\_W

|   |           |           |           |   |           |           |           |
|---|-----------|-----------|-----------|---|-----------|-----------|-----------|
| 7 | -1.837996 | 1.619423  | -0.890499 | 6 | 5.072584  | 1.528709  | -1.580042 |
| 7 | -2.789569 | -0.857443 | -1.593769 | 6 | 6.220703  | 1.344730  | -0.789742 |
| 6 | -1.428442 | 2.834854  | -0.569015 | 6 | 6.184798  | 0.446738  | 0.243488  |
| 6 | -1.983352 | 3.597360  | 0.473261  | 6 | 4.975611  | -0.241620 | 0.508266  |
| 6 | -2.988635 | 3.062147  | 1.215003  | 6 | 4.862690  | -1.215586 | 1.555269  |
| 6 | -3.463477 | 1.768185  | 0.920389  | 6 | 3.859383  | 0.056155  | -0.305773 |
| 6 | -4.553185 | 1.166399  | 1.626920  | 1 | -0.617464 | 3.243182  | -1.166080 |
| 6 | -5.023067 | -0.046564 | 1.275052  | 1 | -1.602983 | 4.592177  | 0.671753  |
| 6 | -4.441717 | -0.773522 | 0.184279  | 1 | -3.441332 | 3.618964  | 2.028896  |
| 6 | -4.920833 | -2.036237 | -0.212667 | 1 | -4.999401 | 1.717848  | 2.447778  |
| 6 | -4.337256 | -2.680139 | -1.263831 | 1 | -5.855007 | -0.496067 | 1.806540  |
| 6 | -3.275290 | -2.042302 | -1.927300 | 1 | -5.750644 | -2.480541 | 0.326981  |
| 6 | -2.852426 | 1.086515  | -0.159488 | 1 | -4.677634 | -3.652678 | -1.597234 |
| 6 | -3.355289 | -0.223367 | -0.533921 | 1 | -2.801726 | -2.530067 | -2.775430 |
| 7 | 1.512170  | -0.260656 | -0.787747 | 1 | -0.486383 | -0.577087 | -1.133233 |
| 6 | 0.369816  | -0.881676 | -0.539614 | 1 | -0.741236 | -2.369509 | 0.558105  |
| 6 | 0.222175  | -1.890868 | 0.428030  | 1 | 1.214173  | -2.980304 | 1.989178  |
| 6 | 1.292810  | -2.226896 | 1.212930  | 1 | 3.609295  | -2.585177 | 2.584324  |
| 6 | 2.529944  | -1.571868 | 0.997258  | 1 | 5.101983  | 2.211177  | -2.425151 |
| 6 | 3.691314  | -1.848283 | 1.792489  | 1 | 7.125004  | 1.893747  | -1.024436 |
| 6 | 2.592868  | -0.613470 | -0.039471 | 1 | 7.057041  | 0.256520  | 0.858989  |
| 7 | 3.917790  | 0.922525  | -1.353768 | 1 | 5.739180  | -1.425492 | 2.158890  |



**Table S15.** The atomic coordinates of OPENAN01\_Tt\_W

|   |           |           |           |   |           |           |           |
|---|-----------|-----------|-----------|---|-----------|-----------|-----------|
| 7 | -1.837996 | 1.619423  | -0.890499 | 6 | 5.072584  | 1.528709  | -1.580042 |
| 7 | -2.789569 | -0.857443 | -1.593769 | 6 | 6.220703  | 1.344730  | -0.789742 |
| 6 | -1.428442 | 2.834854  | -0.569015 | 6 | 6.184798  | 0.446738  | 0.243488  |
| 6 | -1.983352 | 3.597360  | 0.473261  | 6 | 4.975611  | -0.241620 | 0.508266  |
| 6 | -2.988635 | 3.062147  | 1.215003  | 6 | 4.862690  | -1.215586 | 1.555269  |
| 6 | -3.463477 | 1.768185  | 0.920389  | 6 | 3.859383  | 0.056155  | -0.305773 |
| 6 | -4.553185 | 1.166399  | 1.626920  | 1 | -0.617464 | 3.243182  | -1.166080 |
| 6 | -5.023067 | -0.046564 | 1.275052  | 1 | -1.602983 | 4.592177  | 0.671753  |
| 6 | -4.441717 | -0.773522 | 0.184279  | 1 | -3.441332 | 3.618964  | 2.028896  |
| 6 | -4.920833 | -2.036237 | -0.212667 | 1 | -4.999401 | 1.717848  | 2.447778  |
| 6 | -4.337256 | -2.680139 | -1.263831 | 1 | -5.855007 | -0.496067 | 1.806540  |
| 6 | -3.275290 | -2.042302 | -1.927300 | 1 | -5.750644 | -2.480541 | 0.326981  |
| 6 | -2.852426 | 1.086515  | -0.159488 | 1 | -4.677634 | -3.652678 | -1.597234 |
| 6 | -3.355289 | -0.223367 | -0.533921 | 1 | -2.801726 | -2.530067 | -2.775430 |
| 7 | 1.512170  | -0.260656 | -0.787747 | 1 | -0.486383 | -0.577087 | -1.133233 |
| 6 | 0.369816  | -0.881676 | -0.539614 | 1 | -0.741236 | -2.369509 | 0.558105  |
| 6 | 0.222175  | -1.890868 | 0.428030  | 1 | 1.214173  | -2.980304 | 1.989178  |
| 6 | 1.292810  | -2.226896 | 1.212930  | 1 | 3.609295  | -2.585177 | 2.584324  |
| 6 | 2.529944  | -1.571868 | 0.997258  | 1 | 5.101983  | 2.211177  | -2.425151 |
| 6 | 3.691314  | -1.848283 | 1.792489  | 1 | 7.125004  | 1.893747  | -1.024436 |
| 6 | 2.592868  | -0.613470 | -0.039471 | 1 | 7.057041  | 0.256520  | 0.858989  |
| 7 | 3.917790  | 0.922525  | -1.353768 | 1 | 5.739180  | -1.425492 | 2.158890  |

**Table S16.** The atomic coordinates of ZUTDEX\_Tq\_W

|   |           |           |           |   |           |           |           |
|---|-----------|-----------|-----------|---|-----------|-----------|-----------|
| 7 | -1.327607 | -1.542925 | -0.069028 | 6 | -1.457857 | 0.900724  | 0.004334  |
| 6 | -2.647315 | -1.576902 | -0.026588 | 6 | 1.401182  | 0.934829  | -0.022330 |
| 6 | -3.447904 | -0.418118 | 0.030767  | 1 | 0.799948  | -2.303652 | 0.056450  |
| 6 | -2.859086 | 0.805038  | 0.027315  | 1 | -3.108729 | -2.557159 | -0.049015 |
| 6 | -0.708294 | 2.129186  | 0.024828  | 1 | -4.523897 | -0.520985 | 0.061086  |
| 6 | 0.635237  | 2.148998  | -0.009365 | 1 | -3.453998 | 1.709534  | 0.053382  |
| 6 | 2.804160  | 0.851793  | -0.034581 | 1 | -1.261274 | 3.059968  | 0.051892  |
| 6 | 3.452288  | -0.358873 | -0.002418 | 1 | 1.171753  | 3.088677  | -0.008686 |
| 6 | 2.715885  | -1.528043 | 0.053831  | 1 | 3.381608  | 1.767250  | -0.059293 |
| 7 | 1.375901  | -1.462414 | 0.037811  | 1 | 4.529977  | -0.416810 | -0.003211 |
| 6 | 0.687708  | -0.283549 | -0.019035 | 1 | 3.150967  | -2.513920 | 0.102049  |
| 6 | -0.746740 | -0.317671 | -0.024447 |   |           |           |           |
